# Supplementary material for: CT radiomics-based machine learning classification of atypical cartilaginous tumours and appendicular chondrosarcomas
Source: PubMed Central journal article supplement — eBioMedicine. 2021 May 26;68:103407. doi: 10.1016/j.ebiom.2021.103407 (PMC8170113; doi:10.1016/j.ebiom.2021.103407), 2021-05-26
Supplement: mmc1.pdf [file mmc1.pdf]

**Gitto S et al. CT radiomics-based machine learning classification of atypical cartilaginous tumours and appendicular chondrosarcomas**

|                  | <b>Radiomics Quality Score</b> |
|------------------|--------------------------------|
| <b>Item 1</b>    | 1                              |
| <b>Item 2</b>    | 1                              |
| <b>Item 3</b>    | 0                              |
| <b>Item 4</b>    | 0                              |
| <b>Item 5</b>    | 3                              |
| <b>Item 6</b>    | 0                              |
| <b>Item 7</b>    | 1                              |
| <b>Item 8</b>    | 0                              |
| <b>Item 9</b>    | 2                              |
| <b>Item 10</b>   | 1                              |
| <b>Item 11</b>   | 0                              |
| <b>Item 12</b>   | 3                              |
| <b>Item 13</b>   | 2                              |
| <b>Item 14</b>   | 2                              |
| <b>Item 15</b>   | 0                              |
| <b>Item 16</b>   | 1                              |
| <b>total</b>     | 17                             |
| <b>total (%)</b> | 47,22                          |

Reference: Lambin et al. Radiomics: the bridge between medical imaging and personalized medicine. Nat Rev Clin Oncol 2017;14:749-762. doi: 10.1038/nrclinonc.2017.141
